# Supplementary material
Source: PubMed Central journal article supplement (PMC5314107)
Supplement: icb201675x1.pdf [file icb201675x1.pdf]

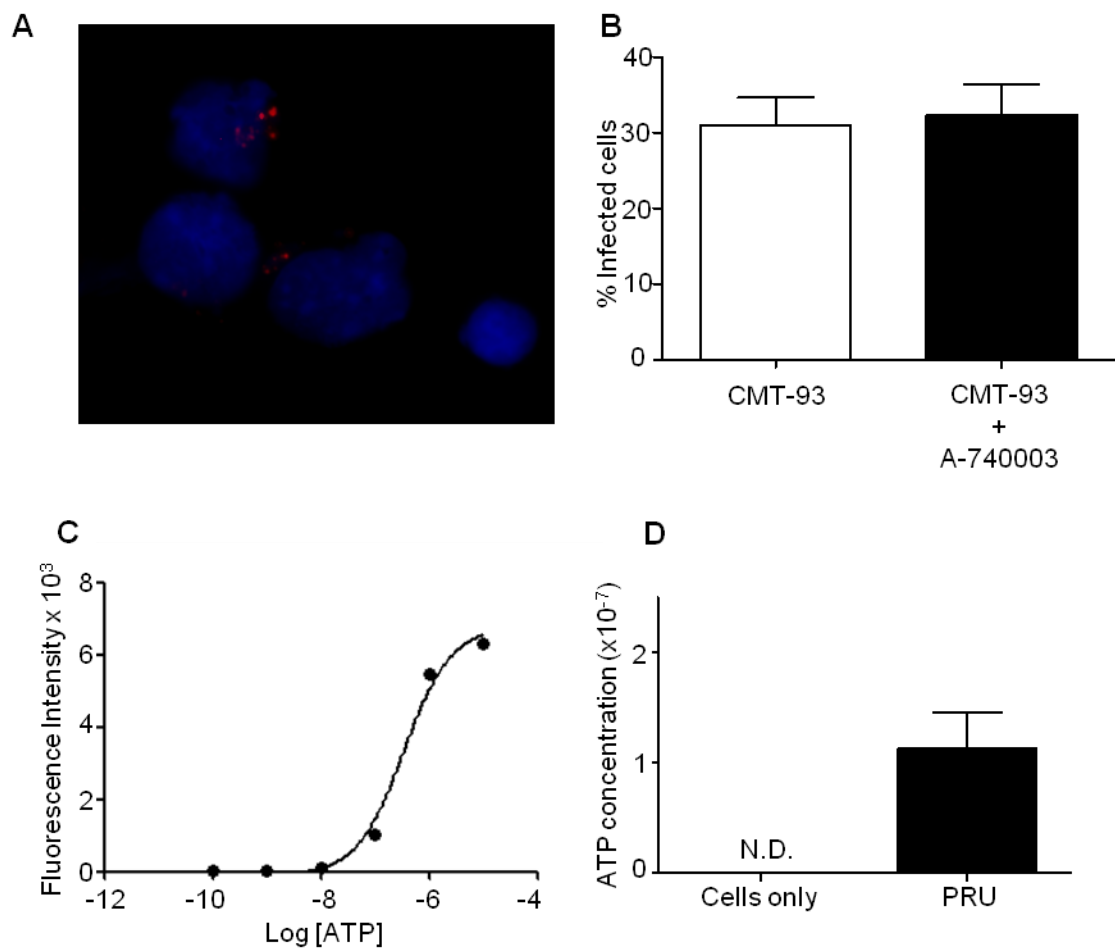

**Supplementary Figure 1. Toxoplasma infection induces ATP secretion by gut epithelial cells.**

Epithelial cells were infected with *T. gondii* PRU strain in a ratio of 1:1 for 6hrs and infectivity in the presence or absence of the P2X7R antagonist assessed by (A) microscopy and enumerated by (B) flow cytometry. The concentrations of ATP in the supernatants after 24 hours of infection were measured using the luciferin–luciferase bioluminescence assay. Shown is (C) the absorbance curve of ATP and (D) the ATP concentration data of control versus infected cells. Data shown are means  $\pm$  SD (n=3 per group). N.D.: non-detectable.

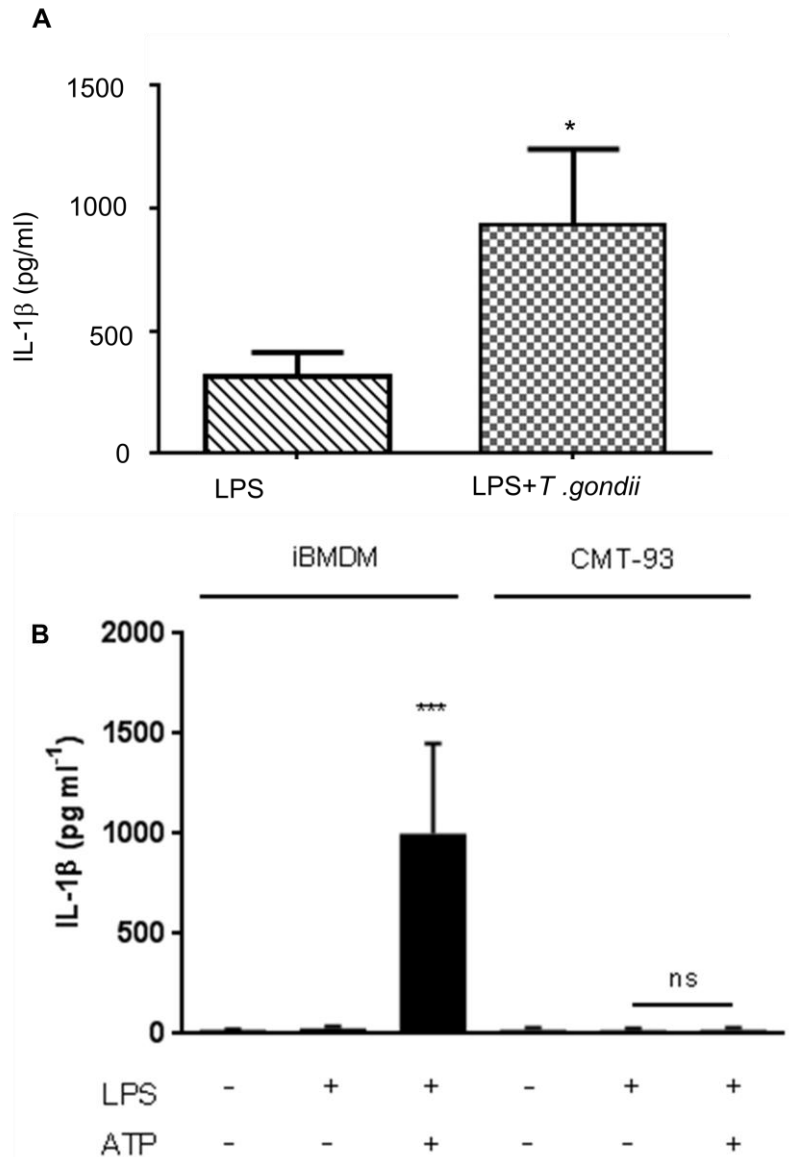

**Supplementary Figure 2 Comparative analyses of macrophage response to infection stimuli**

(A) IL1 $\beta$  secretion by LPS-primed Thp-1 monocyte cells was significantly increased following infection with *T. gondii* (n=3-4) (B) Murine immortalised bone marrow-derived macrophages (iBMDMs) and epithelial CMT-93 cells were primed with LPS (1 $\mu$ g/mL) and stimulated with 5 mM ATP and IL-1 $\beta$  analyzed by ELISA. Data are presented as mean + s.e.m from 4 independent experiments. \*\*\*P<0.001 vs iBMDMs treated with LPS alone or CMT-93 cells treated with LPS and ATP.

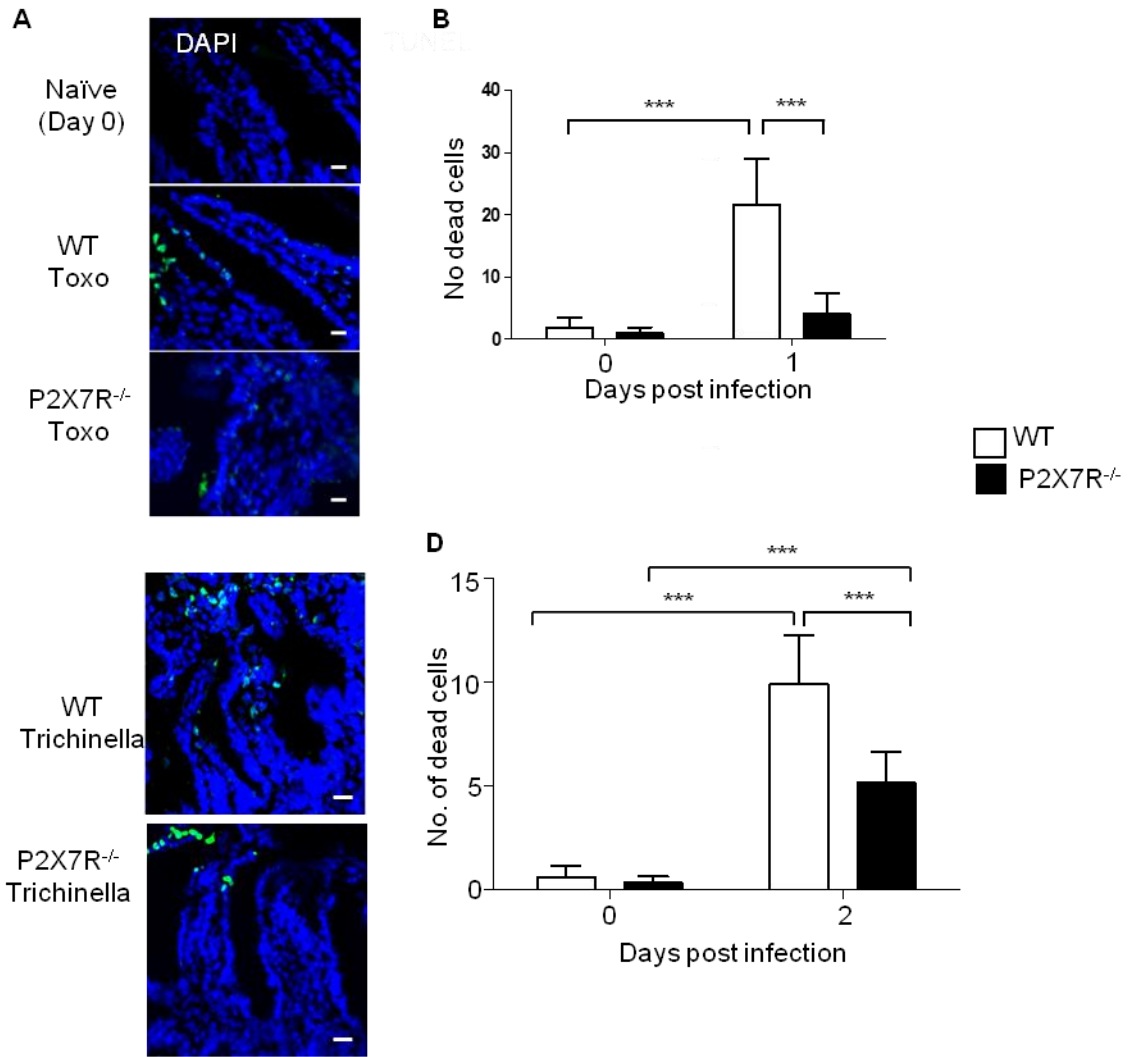

### Supplementary Figure 3: Reduced apoptosis in vivo in the absence of p2X7R

(A) Representative images of TUNEL stained sections of ileum from WT and P2X7R<sup>-/-</sup> mice day 0 and day 1 p.i. with *T. gondii* with the TUNEL<sup>+</sup> dead cells in green. Sections were counterstained with DAPI (blue). (B) Quantification of cell death (TUNEL<sup>+</sup> cells) in WT (white bars) and P2X7R<sup>-/-</sup> mice (black bars). (C) Representative images of TUNEL stained sections from WT and P2X7R<sup>-/-</sup> mice day 2 p.i. with *T. spiralis* and (D) the corresponding quantification. n= 6 per group, pooled from two independent experiments (means ± SD). Statistical difference was measured using two-way ANOVA. \*\*\**P* < 0.001.

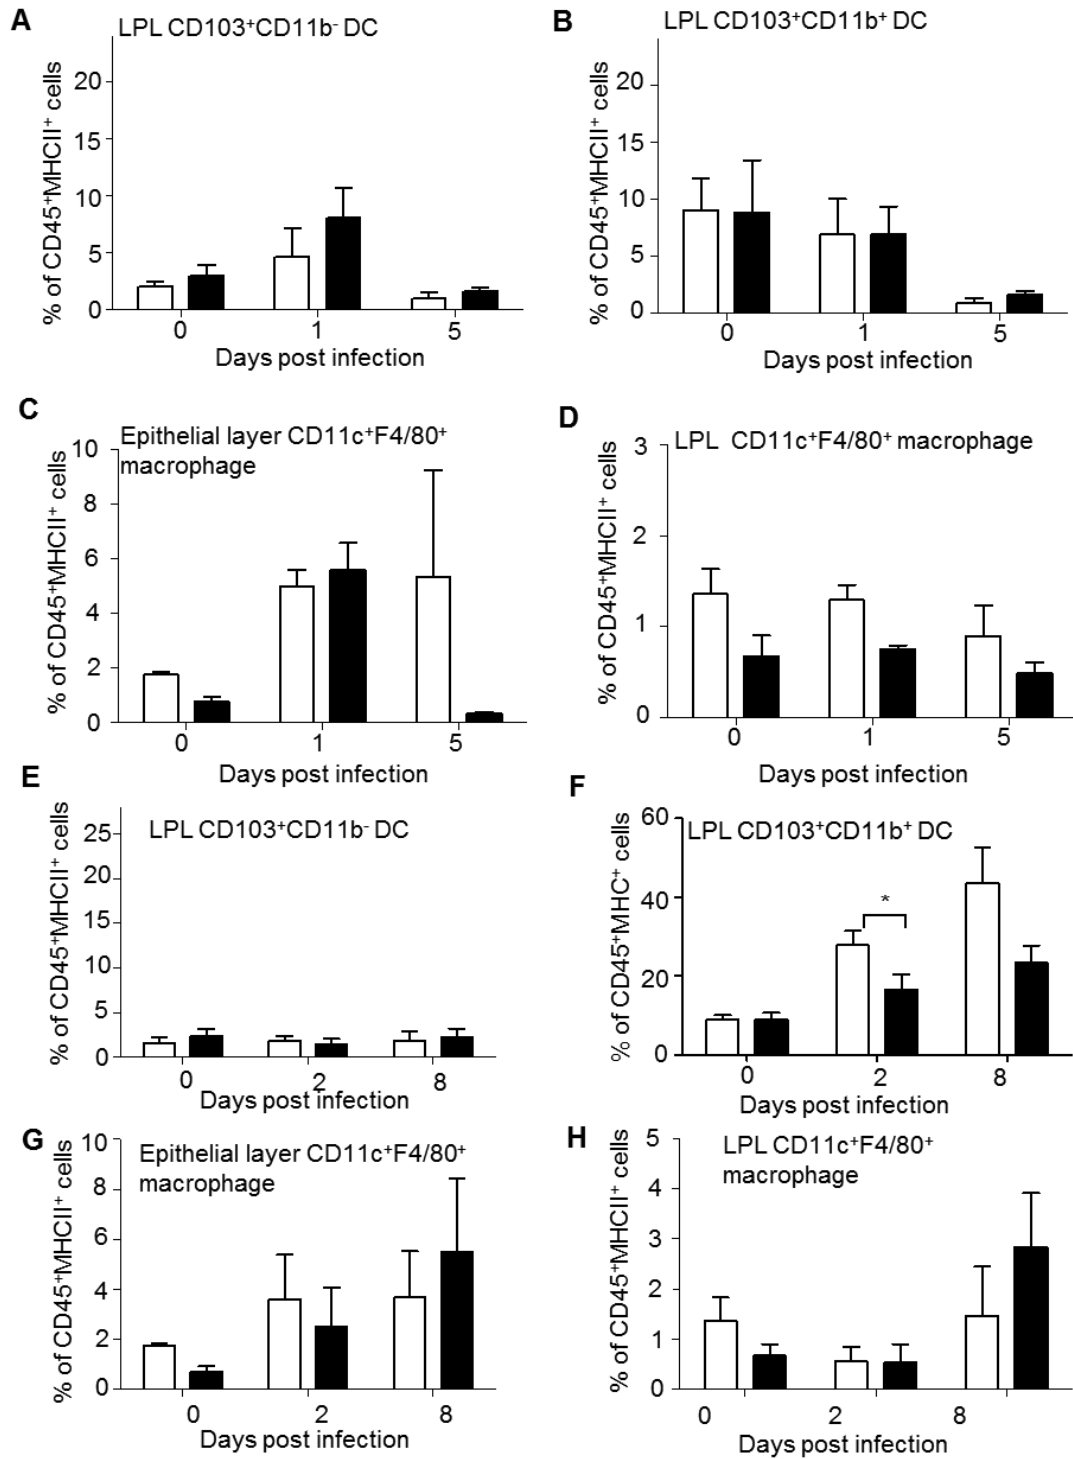

**Supplementary Figure 4. P2X7R deficiency does not affect the recruitment of small intestinal CD103<sup>+</sup> DCs and F4/80<sup>+</sup>CD11c<sup>+</sup> macrophages in response to infection.** C57BL/6 (open bars) and P2X7R<sup>-/-</sup> mice (black bars) were orally infected with *T. gondii* (1x10<sup>6</sup> tachyzoites/mouse) and sacrificed at Day 0 and 1 p.i.. Small intestinal IEC and LPL cells from *T. gondii*-infected mice were

collected and analysed by flow cytometry. The frequency of small intestinal **(A)** epithelial layer and **(B)** LPL compartment of CD45<sup>+</sup>MHCII<sup>+</sup>F4/80<sup>-</sup>CD103<sup>-</sup>CD11b<sup>+</sup> DC (CD103<sup>-</sup>CD11b<sup>+</sup> DC) and **(C)** epithelial layer and **(D)** LPL compartment of CD45<sup>+</sup>MHCII<sup>+</sup>CD11b<sup>+</sup>CD11c<sup>+</sup>F4/80<sup>+</sup> macrophage (CD11c<sup>+</sup>F4/80<sup>+</sup> macrophage) were calculated as the percentage of CD45<sup>+</sup>MHCII<sup>+</sup> cell population. n= 6 per group, pooled from two independent experiments (means  $\pm$  SD). \* $P < 0.05$  and \*\*\* $P < 0.001$  as compared with other time-point groups. Statistical difference was measured using two-way ANOVA with Bonferroni post test.
